# Supplementary material for: Multiple ordered porous honeycombed g-C3N4 with carbon ring in-plane splicing for outstanding photocatalytic H2 production
Source: Royal Society of Chemistry journal article supplement (doi:10.1039/d2ta04163d), 2022-01-01
Supplement: d2ta04163d1.pdf [file d2ta04163d1.pdf]

## Supporting Information

### **Multiple Ordered Porous Honeycombed g-C<sub>3</sub>N<sub>4</sub> with Carbon Ring In-Plane Splicing for Outstanding Photocatalytic H<sub>2</sub> Production**

Xiaobo Wu<sup>a</sup>, Huiqing Fan<sup>\*a</sup>, Weijia Wang<sup>\*a</sup>, Lin Lei<sup>a</sup>, Xinye, Chang<sup>a</sup> and Longtao Ma<sup>\*b</sup>

*<sup>a</sup>State Key Laboratory of Solidification Processing, School of Materials Science and Engineering, Northwestern Polytechnical University, Xi'an, 710072 (P. R. China)*

*<sup>b</sup>Frontiers Science Center for Flexible Electronics, Institute of Flexible Electronics, Northwestern Polytechnical University, Xi'an, 710072 (P. R. China)*

*\*Corresponding author: prof. Huiqing Fan*

*E-mail: hqfan@nwpu.edu.cn*

## Photocatalytic Measurements for Water Splitting

50 mg of sample and 10 mL of triethanolamine (TOEA) were stirred and ultrasonically dispersed in 90 mL deionized water, then Pt co-catalyst (3 wt.%) was in-situ photo-deposited on the photocatalyst by injecting 2 g/L  $\text{H}_2\text{PtCl}_6$  aqueous solution into preceding mixture solution. The whole system was vacuumized before photocatalytic testing and sustained at 10 °C by circulating condensed water. A 300 W Xeon lamp (MAX-302, Asahi Spectra, Torrance, CA, USA) is used as the radiation light source and the wavelength is controlled by a UV cut-off filter. The volume of evolved hydrogen was collected and tested by a gas chromatography instrument. The light intensity was detected by an irradiatometer (FZ-A, PEIFBNU, Beijing, China). AEQ was calculated using Eq. (1):

$$\text{AQE} = \frac{2 \times (\text{Number of hydrogen molecules})}{\text{Number of incident photons}} \times 100\% \quad (1)$$

## Electrochemical Measurements

All electrochemical measurements were carried out in a three-electrode system by means of an electrochemical workstation (CHI660E, Chenhua, Shanghai, China). The photocatalyst paste was prepared by adding several drops of terpineol to the mixture (mass ratio of sample/ethyl cellulose/lauric acid = 5:3:2) and grinding it thoroughly. The working electrode was fabricated by coating paste onto exposed area (a circle of 8 cm in diameter) of FTO conductive glass. The glass is then calcined at 350 °C in a Muffle furnace for half an hour. Therein a square platinum sheet and an Ag/AgCl electrode (3 M KCl) served as the counter electrode and reference electrode, at the same time, 0.5 M  $\text{Na}_2\text{SO}_4$  aqueous solution is selected as the electrolyte. Additionally, the EIS spectra

were measured by imposing an open-circuit voltage with an amplitude of 5 mV under a frequency range of  $10^6$  to  $10^{-2}$  Hz.

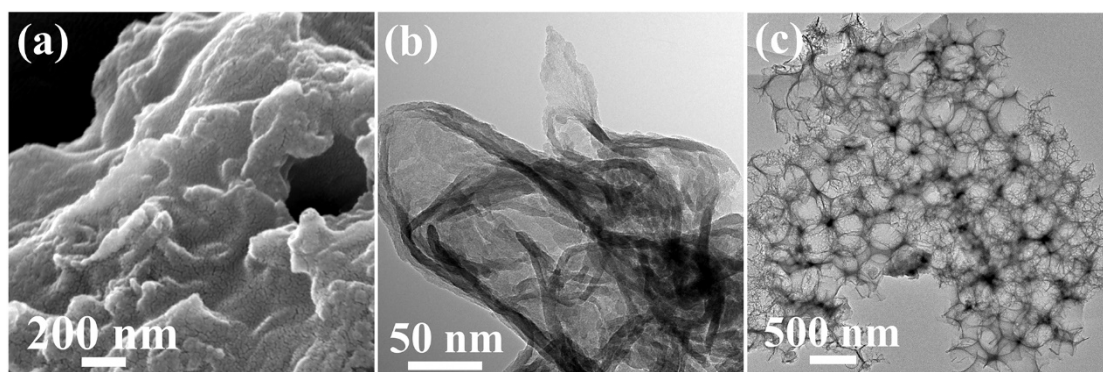

**Fig. S1.** (a) SEM image of CN; TEM images of (b) CN and (c) PHCN.

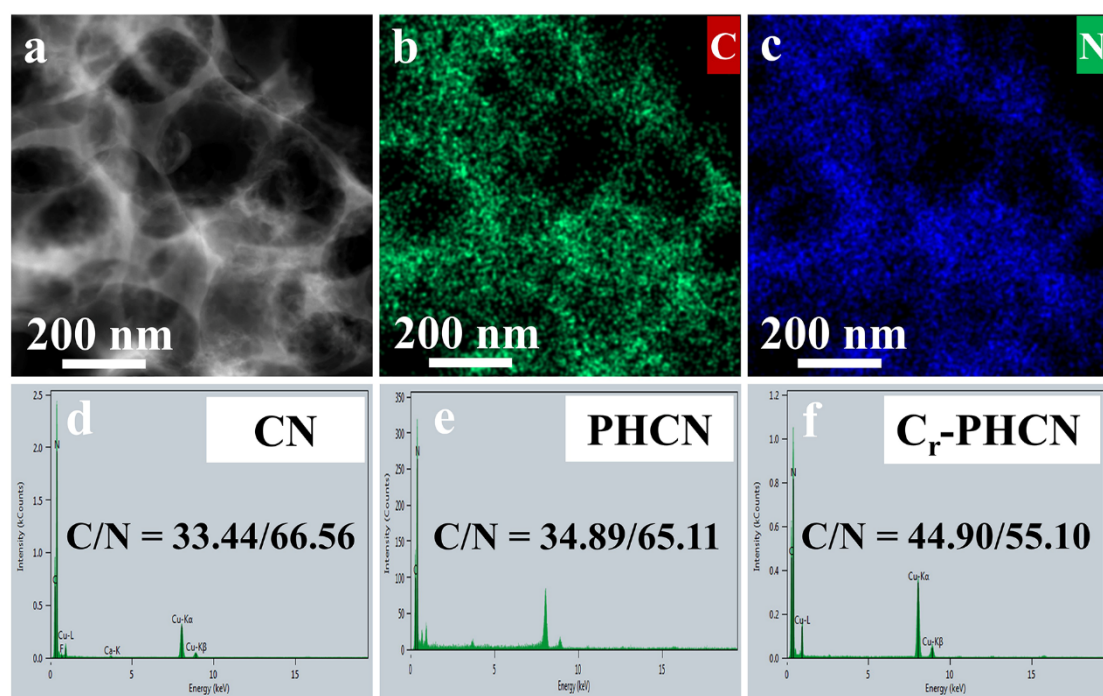

**Fig. S2.** (a), (b) and (c) Elements mapping on C<sub>r</sub>-PHCN; STEM-EDS spectra and atomic fraction of (d) CN, (e) PHCN and (f) C<sub>r</sub>-PHCN.

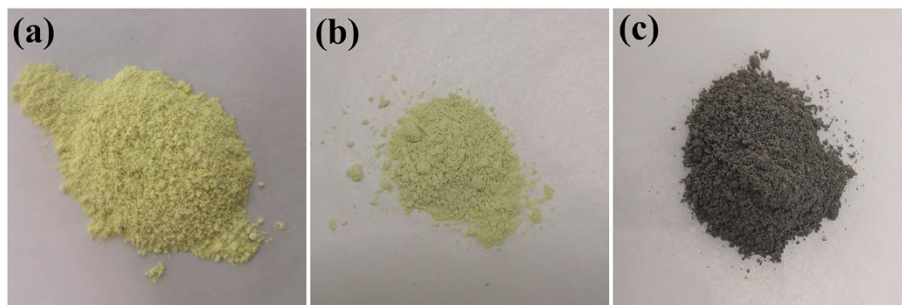

**Fig. S3.** The color of (a) CN, (b) PHCN and (c) C<sub>r</sub>-PHCN.

**Table S1.** Fitting results for the lifetimes of photogenerated charge carriers of CN, PHCN and C<sub>r</sub>-PHCN.

| Sample               | $\tau_{av}$ (ns) | Lifetime (ns)   | Percentage (%) |
|----------------------|------------------|-----------------|----------------|
| CN                   | 3.17             | $\tau_1$ : 1.40 | 82.2           |
|                      |                  | $\tau_2$ : 5.32 | 17.8           |
| CN-NT                | 3.81             | $\tau_1$ : 1.63 | 76.6           |
|                      |                  | $\tau_2$ : 5.82 | 23.3           |
| C <sub>r</sub> -PHCN | 4.58             | $\tau_1$ : 1.84 | 76.3           |
|                      |                  | $\tau_2$ : 6.92 | 23.7           |

**Table S2.** AQE of CN, PHCN and C<sub>r</sub>-PHCN under monochromatic lights with different wavelengths.

| Sample                | $\lambda$ (nm) - AQE (%) |      |      |      |     |
|-----------------------|--------------------------|------|------|------|-----|
|                       | 420                      | 450  | 500  | 550  | 600 |
| CN                    | 0.94                     | 0.29 | 0    | 0    | 0   |
| PHCN                  | 4.48                     | 2.36 | 0.76 | 0.26 | 0   |
| C <sub>r</sub> -PHCN- | 10.62                    | 5.36 | 1.12 | 0.41 | 0   |

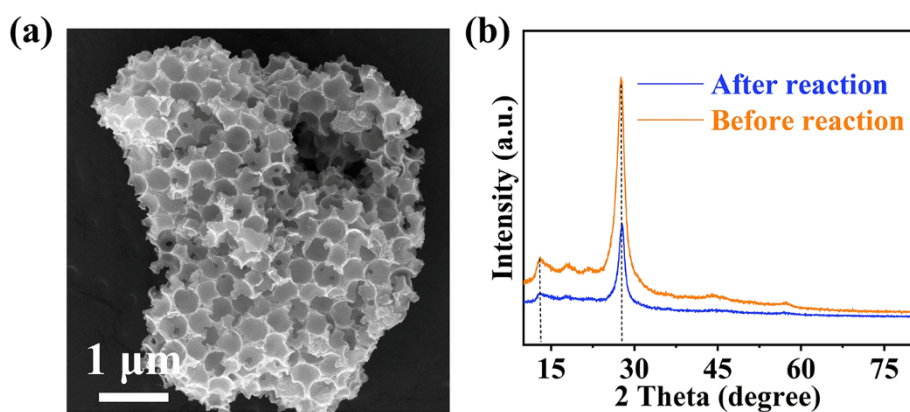

**Fig. S4.** (a) SEM image of  $C_r$ -PHCN after the photocatalytic reaction and (b) XRD patterns of  $C_r$ -PHCN before and after the photocatalytic reaction.

The powder under the  $SiO_2$  templates during the CVD preparation process of  $C_r$ -PHCN was collected as a blank sample, which is carbon ring in-plane seamless splicing carbon nitride (denoted as  $C_r$ -CN). The time courses of  $H_2$  evolution and the average hydrogen evolution rate (HER) are tested under the same conditions.

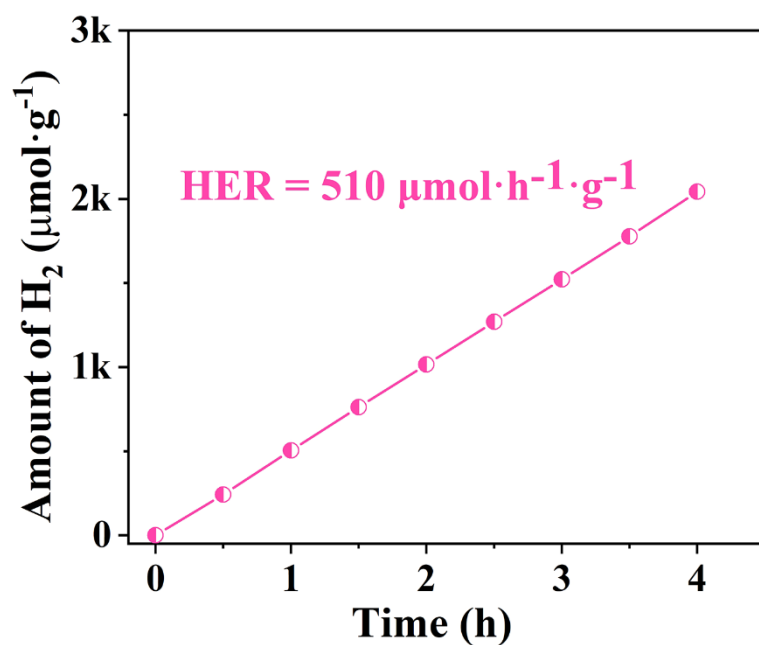

**Fig. S5.** Time courses of  $H_2$  evolution and HER of  $C_r$ -CN.

**Table S3.** The comparison of photocatalytic hydrogen performance of the C<sub>r</sub>-PHCN with other g-C<sub>3</sub>N<sub>4</sub> based photocatalysts.

| Photocatalyst        | Method                | AQE (%) | HER (μmol·h <sup>-1</sup> g <sup>-1</sup> ) | Ref       |
|----------------------|-----------------------|---------|---------------------------------------------|-----------|
| C <sub>r</sub> -PHCN | In-air CVD            | 10.62   | 7581                                        | This work |
| 3DOM CN              | Self-assembly         | 6.27    | 7900                                        | 1         |
| CCN                  | Self-assembly         |         | 6400                                        | 2         |
| CN-10                | NaCl template         | 2.2     | 459                                         | 3         |
| C <sub>r</sub> -CN   | Multistep heating     | 5       | 371                                         | 4         |
| CN-Br-3              | Co-pyrolysis          | 14.3    | 1354                                        | 5         |
| CN-NT                | In-air CVD            | 6.49    | 4605                                        | 6         |
| R-CN                 | In-air CVD            |         | 1900                                        | 7         |
| HOCN                 | Copolymerization      | 4.32    | 1140                                        | 8         |
| CdZnS-HCN            | In-situ precipitation |         | 5145                                        | 9         |

## References

- 1 R. Cao, H. Yang, X. Deng, P. Sun, S. Zhang and X. Xu, *ChemCatChem*, 2018, **10**, 5656-5664.
- 2 G. Liu, M. Xue, Q. Liu, H. Yang and Y. Zhou, *J. Colloid Interface Sci.*, 2019, **552**, 728-734.
- 3 F. Yang, D. Liu, Y. Li, L. Cheng and J. Ye, *Appl. Catal., B*, 2019, **240**, 64-71.
- 4 W. Che, W. Cheng, T. Yao, F. Tang, W. Liu, H. Su, Y. Huang, Q. Liu, J. Liu and F. Hu, *J. Am. Chem. Soc.*, 2017, **139**, 3021-3026.
- 5 C. Liu, H. Huang, L. Ye, S. Yu, N. Tian, X. Du, T. Zhang and Y. Zhang, *Nano Energy*, 2017, **41**, 738-748.
- 6 X. Wu, H. Fan, W. Wang, L. Lei and X. Chang, *ACS Appl. Energy Mater.*, 2021, **4**,

13263-13271.

- 7 L. Cui, J. Song, A. F. McGuire, S. Kang, X. Fang, J. Wang, C. Yin, X. Li, Y. Wang and B. Cui, *ACS Nano*, 2018, **12**, 5551-5558.
- 8 S. Li, C. Hu, Y. Peng and Z. Chen, *RSC Adv.*, 2019, **9**, 32674-32682.
- 9 Q. Liang, C. Zhang, S. Xu, M. Zhou and Z. Li, *Int. J. Hydrogen Energy*, 2019, **44**, 29964-29974.
